# Supplementary material for: Light-responsive fluids based on reversible wormlike micelle to rodlike micelle transitions
Source: Royal Society of Chemistry journal article supplement (doi:10.1039/c6ra05529j), 2016-01-01
Supplement: c6ra05529j1.pdf [file c6ra05529j1.pdf]

## Supporting Information

### **Light-Responsive Fluids Based on Reversible Wormlike Micelle to Rodlike Micelle Transitions**

Zhiyu Xia, Kangle Jia, Xuefeng Li\*, Jinfeng Dong\*

College of Chemistry and Molecular Sciences, Wuhan University, Wuhan 430072, PR China.

\*Corresponding author Email: [lixuefeng@whu.edu.cn](mailto:lixuefeng@whu.edu.cn) (Xuefeng Li), [jfdong@whu.edu.cn](mailto:jfdong@whu.edu.cn) (Jinfeng Dong)

## 1. Synthetic route

4-decylazobenzene-4-(oxyethyl)-dihydroxyethylmethylammonium bromide ( $C_{10}$ AZODEMAB) was synthesized according to the similar procedure as reported previously [1], the detailed synthetic route was shown in **Scheme S1**.

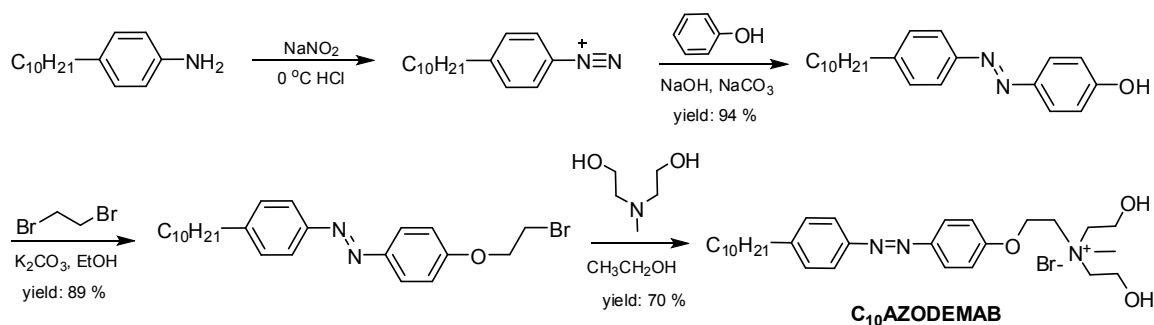

**Scheme S1.** Synthetic route of  $C_{10}$ AZODEMAB

**1.1 Characterization of  $C_{10}$ AZODEMAB:**  $^1\text{H}$  NMR (400 MHz,  $(\text{CD}_3)_2\text{SO}$ )  $\delta$  (ppm): 0.85 (*t*, 3H, - $\text{CH}_3$ ), 1.23~1.29 (*m*, 14H,  $\text{CH}_3\text{-CH}_2\text{-CH}_2\text{-CH}_2\text{-CH}_2\text{-CH}_2\text{-CH}_2\text{-CH}_2\text{-}$ ), 1.61 (*m*, 2H, - $\text{CH}_2\text{-CH}_2\text{-Ar}$ ), 2.66 (*s*, 2H, - $\text{CH}_2\text{-Ar}$ ), 3.25 (*s*, 3H), 3.64 (*m*, 4H), 3.90 (*m*, 4H), 3.98 (*t*, 2H), 4.59 (*t*, 2H), 5.35 (*t*, 2H, -OH), 7.19, 7.21 (*d*, 2H, **H-Ar**), 7.38, 7.41 (*d*, 2H, **H-Ar**), 7.77, 7.80 (*d*, 2H, **H-Ar**), 7.91, 7.93 (*d*, 2H, **H-Ar**).  $^{13}\text{C}$  NMR (100 MHz,  $(\text{CD}_3)_2\text{SO}$ )  $\delta$  (ppm): 14.7, 22.8, 29.3, 29.4, 29.5, 29.7, 31.5, 32.0, 35.7, 50.4, 55.6, 62.0, 62.6, 64.8, 116.0, 123.0, 125.0, 129.9, 146.5, 147.3, 150.8, 160.6. ESI-MS;  $[\text{M}+\text{H}-\text{Br}^-]$   $\text{C}_{29}\text{H}_{46}\text{N}_3\text{O}_3^+$ : Calcd: 484.4, Found: 484.3.

## 1.2 $^1\text{H}$ NMR spectrum of $C_{10}$ AZODEMAB

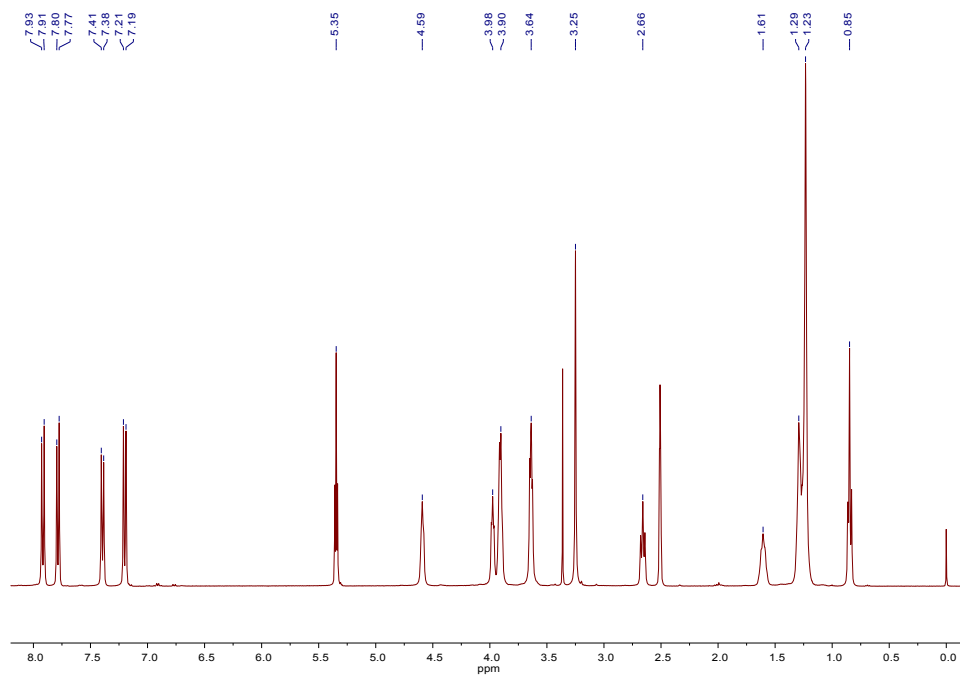

### 1.3 $^{13}\text{C}$ NMR spectrum of $\text{C}_{10}\text{AZODEMAB}$

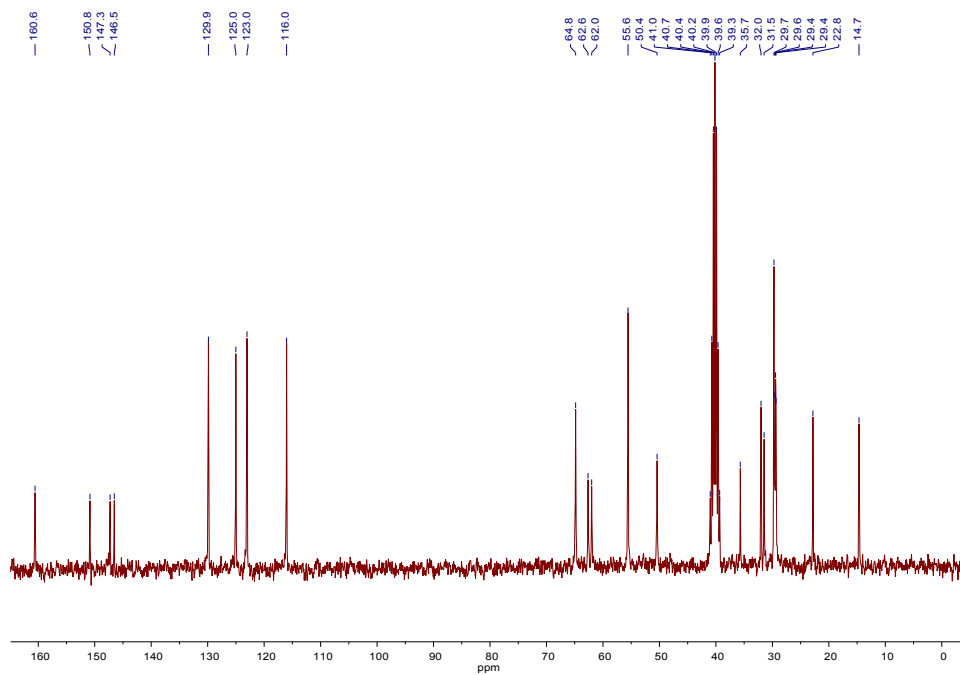

### 1.4 ESI-MS spectrum of $\text{C}_{10}\text{AZODEMAB}$

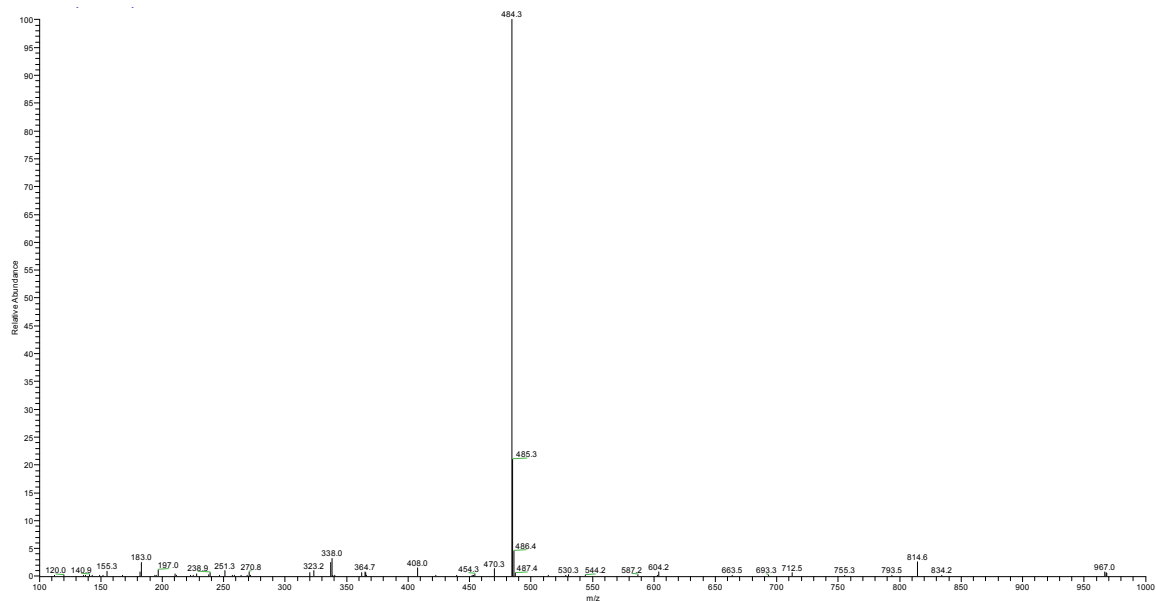

## 2. Critical micelle concentration measurements

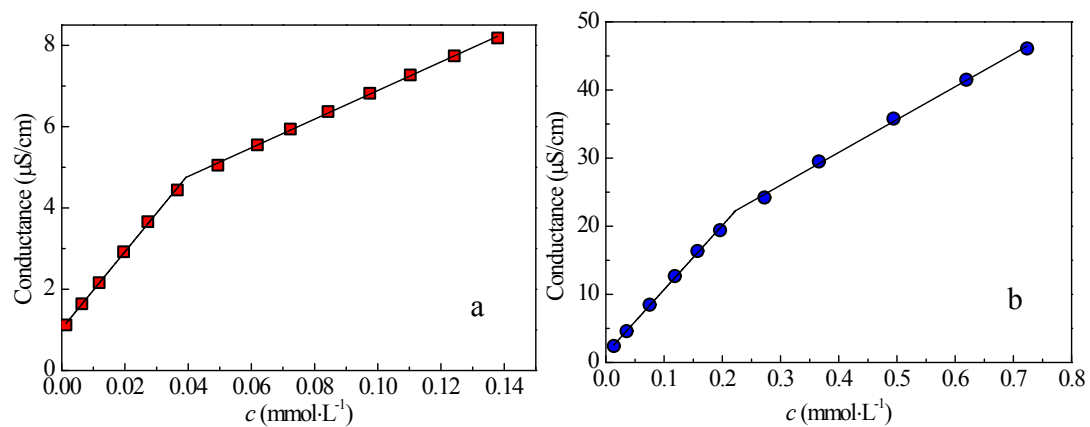

**Figure S1.** Concentration dependent conductance of C<sub>10</sub>AZODEMAB at 30 °C before (a) and after (b) UV light irradiation for 3 h.

## 3. Steady-shear rheological responses

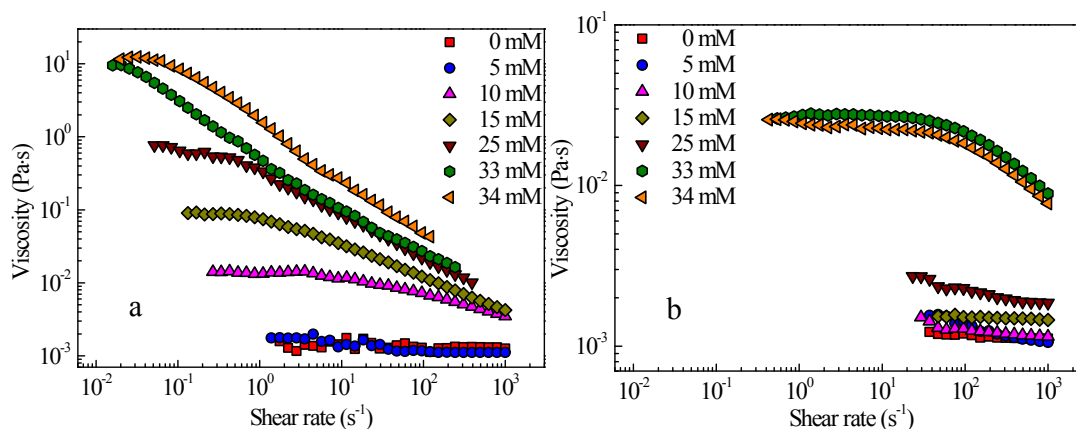

**Figure S2.** [5 mS] dependent steady-shear rheological responses of 30 mmol·L<sup>-1</sup> C<sub>10</sub>AZODEMAB before (a) and after (b) UV light irradiation for 3 h.

#### 4. Irradiation time dependent zero-shear viscosity

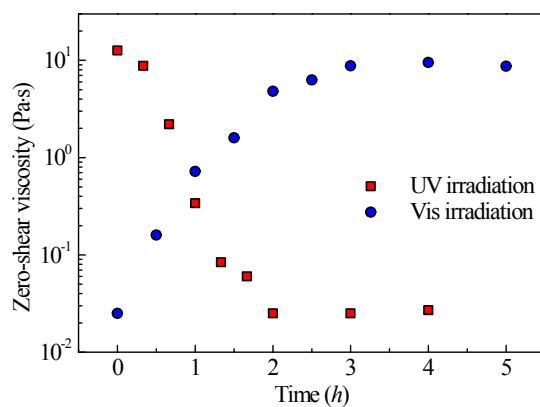

**Figure S3.** Light irradiation time dependent zero-shear viscosity of 30 mmol·L<sup>-1</sup> C<sub>10</sub>AZODEMAB/34 mmol·L<sup>-1</sup> 5 mS binary systems.

#### 5. UV-Vis Spectra of 30 mmol·L<sup>-1</sup> C<sub>10</sub>AZODEMAB/34 mmol·L<sup>-1</sup> 5 mS binary systems

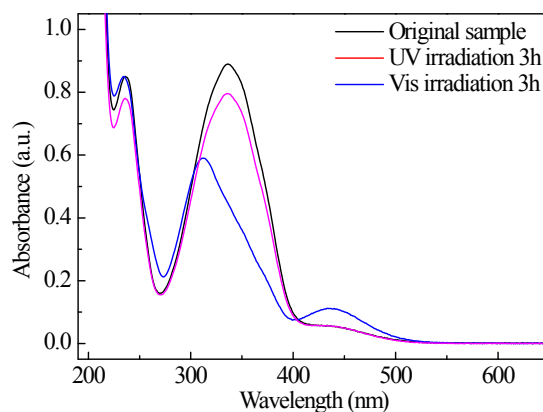

**Figure S4.** Effects of irradiation conditions on UV-Vis spectra of  $0.05 \text{ mmol}\cdot\text{L}^{-1}$   $\text{C}_{10}\text{AZODEMAB}$  solutions. Samples were prepared by diluting the concentrated  $\text{C}_{10}\text{AZODEMAB}/5 \text{ mS}$  binary mixtures ( $30 \text{ mmol}\cdot\text{L}^{-1}/34 \text{ mmol}\cdot\text{L}^{-1}$ ) using ultrapure deionized water.

**References:**

[1] K. L. Jia, Y. M. Cheng, X. Liu, X. F. Li and J. F. Dong, *RSC Adv.*, 2015, **5**, 640-642.
